# Supplementary material
Source: Springer Nature journal article supplement (https://www.springermedizin.de/resource/supplementary/12879_2007_607_MOESM2_ESM.pdf/9449300)

Approximate expected shape of the distribution of times since infection among patients detected, given different incidence ( $\lambda$ ) scenarios:

Expected shape of the true distribution of stage 1 survival after infection, given different scenarios:

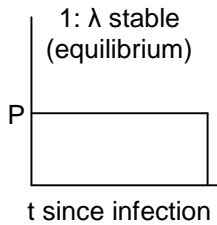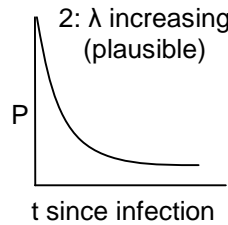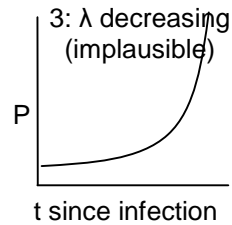

Observed shape of the distribution of stage 1 survival after detection, given combinations of the different scenarios:

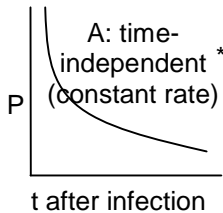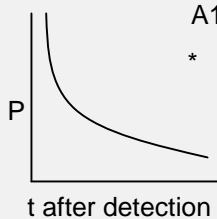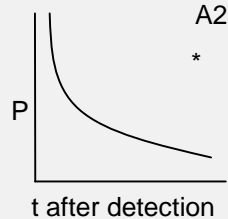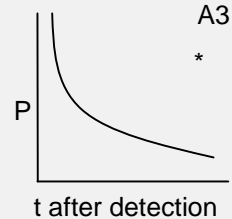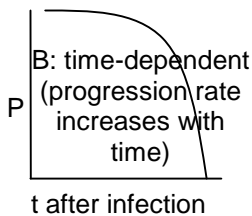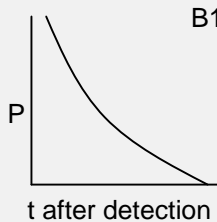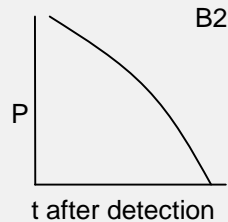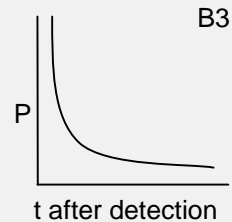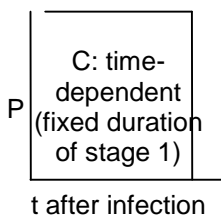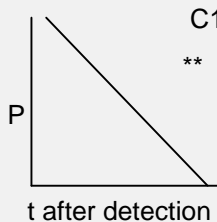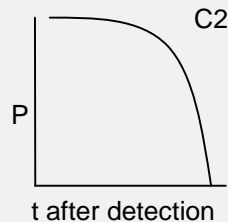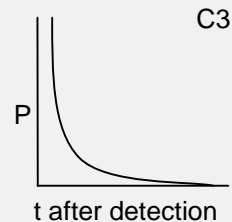

Supplement: MOESM2 [file 9449300]
